# Supplementary material for: Perceptions of scientific research literature and strategies for reading papers depend on academic career stage
Source: PLOS journal article supplement (doi:10.1371/journal.pone.0189753), 2017-12-28
Supplement: S1 (10.1371/journal.pone.0189753.s001) [file journal.pone.0189753.s001]

## **S1 File: Undergraduate Student Survey**

NB This survey was administered online via [www.surveymonkey.com](http://www.surveymonkey.com), so the layout below does not match the online version. The text and order of questions is identical, with the exception of where institutional specific terms have been amended for a broader audience [indicated with italic text].

| <b>1: Which year of study are you in?</b> |                            |
|-------------------------------------------|----------------------------|
| <i>2<sup>nd</sup> year</i>                | <i>3<sup>rd</sup> year</i> |

| <b>2: Which subjects did you study for your <i>2<sup>nd</sup> year</i>?</b> |                        |                                |            |
|-----------------------------------------------------------------------------|------------------------|--------------------------------|------------|
| Animal Biology                                                              | Biochemistry           | Cell and Developmental Biology | Ecology    |
| Neurobiology                                                                | Pathology              | Pharmacology                   | Physiology |
| Plant and Microbial Sciences                                                | Other [please specify] |                                |            |

| <b>3: Which <i>3<sup>rd</sup> year</i> subject are you studying?</b> |                        |                                          |                |
|----------------------------------------------------------------------|------------------------|------------------------------------------|----------------|
| I am a <i>2<sup>nd</sup> year</i> student                            | Biochemistry           | Genetics                                 | Neuroscience   |
| Pathology                                                            | Pharmacology           | Physiology, Neuroscience and Development | Plant Sciences |
| Zoology                                                              | Other [please specify] |                                          |                |

| <b>4: On average, how many PRIMARY RESEARCH papers do you read?</b> |      |              |                       |              |                        |
|---------------------------------------------------------------------|------|--------------|-----------------------|--------------|------------------------|
| Papers recommended by lecturers                                     | None | One per term | One per lecture block | One per week | More than one per week |
| Papers required for <i>tutorial</i> discussions                     | None | One per term | One per lecture block | One per week | More than one per week |
| Papers recommended by <i>tutors</i>                                 | None | One per term | One per lecture block | One per week | More than one per week |
| Papers recommended by other students                                | None | One per term | One per lecture block | One per week | More than one per week |
| Papers you have found yourself                                      | None | One per term | One per lecture block | One per week | More than one per week |

| <b>5: On average, how many REVIEW papers do you read?</b> |      |              |                       |              |                        |
|-----------------------------------------------------------|------|--------------|-----------------------|--------------|------------------------|
| Papers recommended by lecturers                           | None | One per term | One per lecture block | One per week | More than one per week |
| Papers required for <i>tutorial</i> discussions           | None | One per term | One per lecture block | One per week | More than one per week |
| Papers recommended by <i>tutors</i>                       | None | One per term | One per lecture block | One per week | More than one per week |
| Papers recommended by other students                      | None | One per term | One per lecture block | One per week | More than one per week |
| Papers you have found yourself                            | None | One per term | One per lecture block | One per week | More than one per week |

| <b>6: When trying to finding a paper, which of the following tools do you use? Select all that apply.</b> |                        |        |                                           |
|-----------------------------------------------------------------------------------------------------------|------------------------|--------|-------------------------------------------|
| Google                                                                                                    | Google Scholar         | PubMed | Mendeley                                  |
| ScienceDirect                                                                                             | Web of Science         | Scopus | Direct links to papers provided by others |
| Direct links to papers obtained via social media (e.g. Twitter, Facebook)                                 | Other (please specify) |        |                                           |

| <b>7: To what extent would you agree with the following statements?</b>                      |                   |          |                   |                |       |                |
|----------------------------------------------------------------------------------------------|-------------------|----------|-------------------|----------------|-------|----------------|
| I enjoy reading research papers                                                              | Strongly Disagree | Disagree | Disagree somewhat | Agree somewhat | Agree | Strongly Agree |
| I am confident in reading research papers without guidance (e.g. from supervisors)           | Strongly Disagree | Disagree | Disagree somewhat | Agree somewhat | Agree | Strongly Agree |
| I know how to find research papers on a given topic                                          | Strongly Disagree | Disagree | Disagree somewhat | Agree somewhat | Agree | Strongly Agree |
| I know how to read research papers to extract information efficiently                        | Strongly Disagree | Disagree | Disagree somewhat | Agree somewhat | Agree | Strongly Agree |
| I know how to identify papers that are of critical importance to the area I am investigating | Strongly Disagree | Disagree | Disagree somewhat | Agree somewhat | Agree | Strongly Agree |

| <b>8: To what extent would you agree with the following statements?</b> |                   |          |                   |                |       |                |
|-------------------------------------------------------------------------|-------------------|----------|-------------------|----------------|-------|----------------|
| Reading research papers is a good use of my time                        | Strongly Disagree | Disagree | Disagree somewhat | Agree somewhat | Agree | Strongly Agree |
| Reading research papers is frustrating                                  | Strongly Disagree | Disagree | Disagree somewhat | Agree somewhat | Agree | Strongly Agree |
| Reading research papers is important for my general scientific training | Strongly Disagree | Disagree | Disagree somewhat | Agree somewhat | Agree | Strongly Agree |
| Reading research papers is important for success in this years exams    | Strongly Disagree | Disagree | Disagree somewhat | Agree somewhat | Agree | Strongly Agree |

| <b>9: To what extent would you agree with the following statements:</b> |                   |          |                   |                |       |                |
|-------------------------------------------------------------------------|-------------------|----------|-------------------|----------------|-------|----------------|
| <b>I read PRIMARY RESEARCH papers to .....</b>                          |                   |          |                   |                |       |                |
| Broaden my knowledge                                                    | Strongly Disagree | Disagree | Disagree somewhat | Agree somewhat | Agree | Strongly Agree |
| Understand the topic in more detail                                     | Strongly Disagree | Disagree | Disagree somewhat | Agree somewhat | Agree | Strongly Agree |
| Critically evaluate the data                                            | Strongly Disagree | Disagree | Disagree somewhat | Agree somewhat | Agree | Strongly Agree |
| Fill in gaps in understanding from the lectures                         | Strongly Disagree | Disagree | Disagree somewhat | Agree somewhat | Agree | Strongly Agree |
| Find examples to include in exam answers                                | Strongly Disagree | Disagree | Disagree somewhat | Agree somewhat | Agree | Strongly Agree |
| Understand the research methods used                                    | Strongly Disagree | Disagree | Disagree somewhat | Agree somewhat | Agree | Strongly Agree |

|                               |                   |          |                   |                |       |                |
|-------------------------------|-------------------|----------|-------------------|----------------|-------|----------------|
| Improve my scientific writing | Strongly Disagree | Disagree | Disagree somewhat | Agree somewhat | Agree | Strongly Agree |
| Other (please specify)        |                   |          |                   |                |       |                |

**10: To what extent would you agree with the following statements:**

**I read REVIEW papers to .....**

|                                                 |                   |          |                   |                |       |                |
|-------------------------------------------------|-------------------|----------|-------------------|----------------|-------|----------------|
| Broaden my knowledge                            | Strongly Disagree | Disagree | Disagree somewhat | Agree somewhat | Agree | Strongly Agree |
| Understand the topic in more detail             | Strongly Disagree | Disagree | Disagree somewhat | Agree somewhat | Agree | Strongly Agree |
| Critically evaluate the data                    | Strongly Disagree | Disagree | Disagree somewhat | Agree somewhat | Agree | Strongly Agree |
| Fill in gaps in understanding from the lectures | Strongly Disagree | Disagree | Disagree somewhat | Agree somewhat | Agree | Strongly Agree |
| Find examples to include in exam answers        | Strongly Disagree | Disagree | Disagree somewhat | Agree somewhat | Agree | Strongly Agree |
| Understand the research methods used            | Strongly Disagree | Disagree | Disagree somewhat | Agree somewhat | Agree | Strongly Agree |
| Improve my scientific writing                   | Strongly Disagree | Disagree | Disagree somewhat | Agree somewhat | Agree | Strongly Agree |
| Other (please specify)                          |                   |          |                   |                |       |                |

**11: How easy do you usually find it to understand the following aspects of a research paper?**

|                                  |                |           |                    |               |      |           |
|----------------------------------|----------------|-----------|--------------------|---------------|------|-----------|
| Abstract                         | Very Difficult | Difficult | Somewhat difficult | Somewhat easy | Easy | Very Easy |
| Introduction                     | Very Difficult | Difficult | Somewhat difficult | Somewhat easy | Easy | Very Easy |
| Materials and Methods            | Very Difficult | Difficult | Somewhat difficult | Somewhat easy | Easy | Very Easy |
| Results – Figures and Tables     | Very Difficult | Difficult | Somewhat difficult | Somewhat easy | Easy | Very Easy |
| Results – Text based description | Very Difficult | Difficult | Somewhat difficult | Somewhat easy | Easy | Very Easy |
| Discussion                       | Very Difficult | Difficult | Somewhat difficult | Somewhat easy | Easy | Very Easy |

**12: How important do you think the following aspects of a research paper are for understanding it?**

|                                  |                  |             |                      |                    |           |                |
|----------------------------------|------------------|-------------|----------------------|--------------------|-----------|----------------|
| Abstract                         | Very Unimportant | Unimportant | Somewhat unimportant | Somewhat important | Important | Very Important |
| Introduction                     | Very Unimportant | Unimportant | Somewhat unimportant | Somewhat important | Important | Very Important |
| Materials and Methods            | Very Unimportant | Unimportant | Somewhat unimportant | Somewhat important | Important | Very Important |
| Results – Figures and Tables     | Very Unimportant | Unimportant | Somewhat unimportant | Somewhat important | Important | Very Important |
| Results – Text based description | Very Unimportant | Unimportant | Somewhat unimportant | Somewhat important | Important | Very Important |
| Discussion                       | Very Unimportant | Unimportant | Somewhat unimportant | Somewhat important | Important | Very Important |

**13: Please rank the following sections of research papers in the order of how easy you find them to read. 1 = easiest, 6 = most difficult.**

|          |              |                          |                                 |                                     |            |
|----------|--------------|--------------------------|---------------------------------|-------------------------------------|------------|
| Abstract | Introduction | Materials<br>and Methods | Results – Figures<br>and Tables | Results – Text<br>based description | Discussion |
|----------|--------------|--------------------------|---------------------------------|-------------------------------------|------------|

**14: Please rank the following sections of papers in the order of importance you think they are to understanding research papers. 1 = most important, 6 = least important.**

|          |              |                          |                                 |                                     |            |
|----------|--------------|--------------------------|---------------------------------|-------------------------------------|------------|
| Abstract | Introduction | Materials<br>and Methods | Results – Figures<br>and Tables | Results – Text<br>based description | Discussion |
|----------|--------------|--------------------------|---------------------------------|-------------------------------------|------------|

[Teaching Questions not relevant to current manuscript have been omitted for clarity here]

**15: I give my consent for my answers to this survey to be used in any publications resulting from this work**

|     |    |
|-----|----|
| Yes | No |
|-----|----|
